# Supplementary material for: Effects of Gabapentin on the Treatment of Behavioral Disorders in Dogs: A Retrospective Evaluation
Source: MDPI journal article supplement (doi:10.3390/ani14101462), 2024-05-14
Supplement: s1 [file s1]

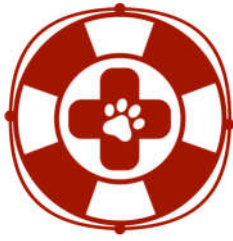

# Massachusetts Veterinary Behavior

## Retrospective Evaluation of Gabapentin in Dogs

### 1. Contact Information

Owner Name (first and last):

Dog Name:

Email Address:

Phone Number:

Our records indicate that gabapentin was prescribed to your dog. Is this correct?

Yes      No

### 2. Gabapentin Dose/Frequency

Did you try more than one dose of gabapentin?

Yes      No

What is the highest and lowest dose of gabapentin (in mg) you have given (or if current, what is the dose you currently give)?

Highest Dose (mg):

Lowest Dose (mg):

Current Dose (mg):

Which dose of gabapentin (in mg) did you/do you most commonly use?

Which of the following best describes how frequently you gave gabapentin to your dog?

☐ Gabapentin was given every day

☐ Gabapentin was only given as needed

☐ I used this medication only 1-3 times

☐ Other (please specify):

### 3. Efficacy

What was the effectiveness of gabapentin when given to your dog? Would you describe it as:

☐ Very effective

☐ Moderately effective

☐ Slightly effective

☐ Not at all effective

### 4. Side Effects

We would now like to ask about the side effects your dog experienced at the low dose and high doses of gabapentin.

For the following listed side effects, please answer yes or no as to whether your dog experienced that effect at the low and/or high dose (if you answered "yes" to the given side effect, please describe how much the side effect bothered you):

| Side Effect                                                                                                                                                                                         | Low Dose |    | High Dose |    | Did this side effect bother you? |          |           |     |
|-----------------------------------------------------------------------------------------------------------------------------------------------------------------------------------------------------|----------|----|-----------|----|----------------------------------|----------|-----------|-----|
|                                                                                                                                                                                                     | Yes      | No | Yes       | No | Not at all                       | Somewhat | Very much | N/A |
| Sedation (your dog was sleepy/tired from this medication)                                                                                                                                           |          |    |           |    |                                  |          |           |     |
| Unsteady or “drunk” (falling, stumbling, bumping into walls, etc.)                                                                                                                                  |          |    |           |    |                                  |          |           |     |
| Increased activity (running or jumping around, as though your dog had just had a very strong cup of coffee)                                                                                         |          |    |           |    |                                  |          |           |     |
| Agitation (seemed irritable, restless, difficulty relaxing, vocalizing)                                                                                                                             |          |    |           |    |                                  |          |           |     |
| Increased appetite                                                                                                                                                                                  |          |    |           |    |                                  |          |           |     |
| Vomiting                                                                                                                                                                                            |          |    |           |    |                                  |          |           |     |
| Diarrhea                                                                                                                                                                                            |          |    |           |    |                                  |          |           |     |
| Constipation                                                                                                                                                                                        |          |    |           |    |                                  |          |           |     |
| Urine Dribbling                                                                                                                                                                                     |          |    |           |    |                                  |          |           |     |
| New aggression (meaning your dog growled, snapped, lunged, or bit people or other animals when under the influence of this drug when your dog had never previously shown aggression in any context) |          |    |           |    |                                  |          |           |     |
| Increased aggression (meaning your dog growled, snapped, lunged, or bit a person or animal in a manner that is very uncharacteristic for this dog when not under the influence of this medication)  |          |    |           |    |                                  |          |           |     |

Are you still administering gabapentin? If you answer “no” to the following question, please skip to section 5.

Yes      No

Why did you discontinue gabapentin (check all that apply)?

- ☐ Was no longer needed
- ☐ Was not effective
- ☐ Undesirable effects
- ☐ Other (please specify):

If you answered “undesirable effects” as the reason to discontinue gabapentin, please tell us the undesirable effects you witnessed (check all that apply):

- ☐ too sleepy
- ☐ too unsteady or “drunk”

- ☐ activity level too high
- ☐ caused or worsened aggression
- ☐ caused diarrhea
- ☐ caused constipation
- ☐ caused constant urine dribbling
- ☐ difficult to get dog to take pill
- ☐ appetite too high
- ☐ Other (please specify):
